# Supplementary material for: Phenylcarbazole-stabilized palladium catalysts for efficient acetylene hydrochlorination
Source: Royal Society of Chemistry journal article supplement (doi:10.1039/d4cy01414f), 2025-01-01
Supplement: d4cy01414f9.pdf [file d4cy01414f9.pdf]

**Supplementary Information for:**

**Phenylcarbazole-Stabilized Palladium Catalysts for Efficient  
Acetylene Hydrochlorination**

*Shahid Ali<sup>a#</sup>, Lu Wang<sup>ab#\*</sup>, Haijun Yan<sup>a</sup>, Lei Dang<sup>a</sup>, Chao Yang<sup>a</sup>, Jide Wang<sup>a</sup>, Hui Sun<sup>ac\*</sup>,  
Xiaofei Li<sup>b</sup>, Ronglan Wu<sup>ab</sup>, Changhai Liang<sup>d\*</sup>*

<sup>a</sup> Key Laboratory of Oil and Gas Fine Chemicals, Ministry of Education & Xinjiang Uygur Autonomous Region, School of Chemical Engineering, Xinjiang University, Urumqi, 830017, China.

<sup>b</sup> China Merchants Xinjiang Quality Testing Technology Research Institute Co., LTD, Urumqi 841100, China.

<sup>c</sup> State Key Laboratory of Chemical Engineering, School of Chemical Engineering, East China University of Science and Technology, Shanghai, 200237, China.

<sup>d</sup> State Key Laboratory of Fine Chemicals, Dalian University of Technology, Dalian 116086, China.

*\*Corresponding author:*

*Tel: +86-0991-8581018; Fax: +86-0991-8581018*

*E-mail: wanglu\_4951@163.com (Lu Wang); sunhui@ecust.edu.cn (Hui Sun),*

*changhai@dlut.edu.cn (Changhai Liang)*

*#The two authors contributed equally to this work.*

## Figure Captions:

**Fig S1** Conversion of acetylene over Pd-PCz/SAC catalyst. Reaction conditions:  $T = 160\text{ }^{\circ}\text{C}$ ,  $\text{GHSV}(\text{C}_2\text{H}_2) = 120\text{ h}^{-1}$ , and  $V(\text{HCl}) : V(\text{C}_2\text{H}_2) = 1.25$

**Fig S2** XRD surveys of Pd-based/SAC catalysts

**Fig S3** TGA and DTG splines of the fresh (a) and used (b) Pd-PCz/SAC catalysts

**Fig S4** XPS surveys of Pd-based/SAC catalysts

**Fig S5** XPS pattern of relative nitrogen content in the fresh (a) and used (b) Pd-PCz/SAC catalysts

**Fig S6** ESP mapped molecular surface along with ESP array of  $\text{PdCl}_2$  &  $\text{PCz-PdCl}_2$  (a),  $\text{PdCl}_2\text{-PCz-C}_2\text{H}_2$  (b),  $\text{PdCl}_2\text{-PCz-HCl}$  (c) and  $\text{PdCl}_2\text{-PCz-C}_2\text{H}_3\text{Cl}$  (d)

**Fig S7** The most favorable adsorption configuration of  $\text{C}_2\text{H}_2$ ,  $\text{HCl}$ , and  $\text{VCM}$  with  $\text{PdCl}_2$  and  $\text{PdCl}_2\text{-PCz}$  catalyst (all the bond distances are presented in  $\text{\AA}$ )

## Table Captions:

**Table S1** Performance of Pd-based catalysts for acetylene hydrochlorination

**Table S2** Relative contents of palladium species in catalysts

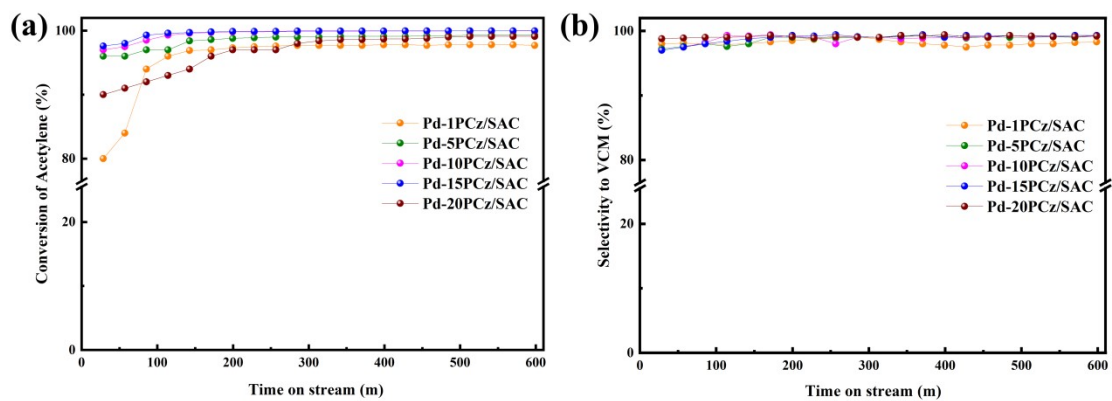

**Fig. S1** Conversion of acetylene over Pd-PCz/SAC catalysts. Reaction conditions:  $T = 160\text{ }^{\circ}\text{C}$   
 $\text{GHSV}(\text{C}_2\text{H}_2) = 120\text{ h}^{-1}$ , and  $V(\text{HCl}) : V(\text{C}_2\text{H}_2) = 1.25$

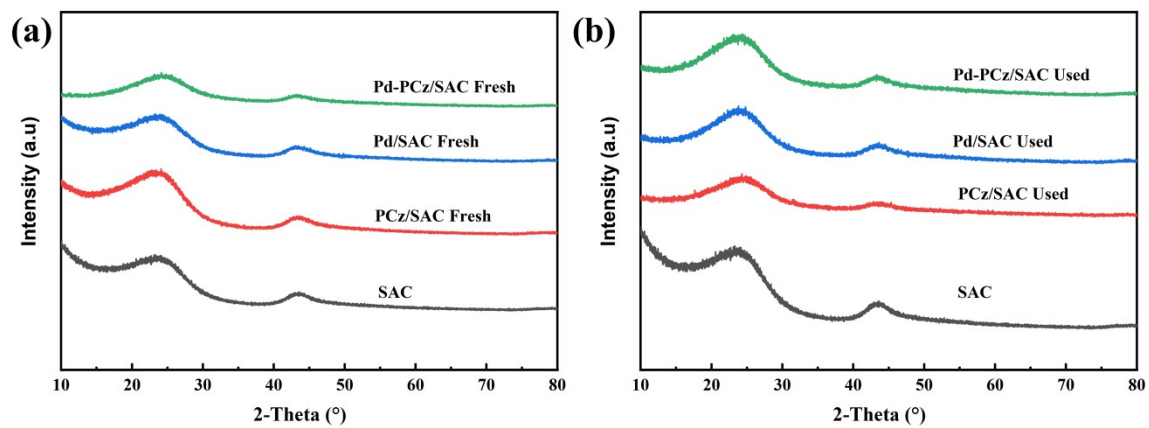

**Fig. S2** XRD surveys of Pd-based catalysts

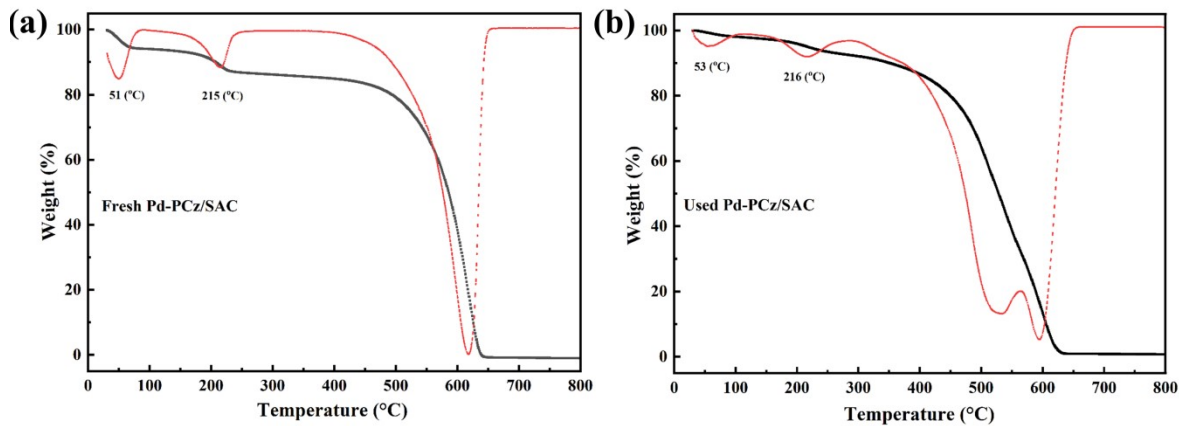

Fig S3 TGA and DTG splines of the fresh (a) and used (b) Pd-PCz/SAC catalysts

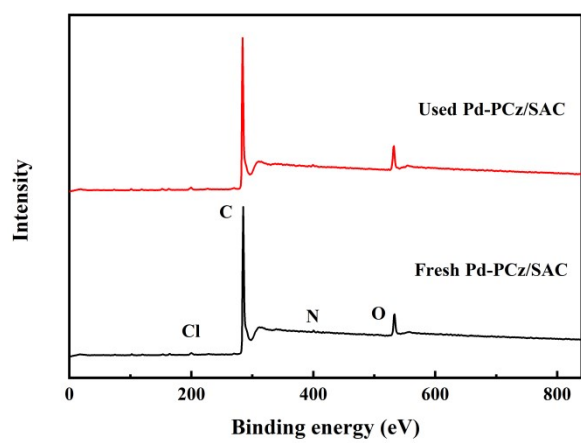

**Fig. S4** XPS surveys of Pd-based catalysts

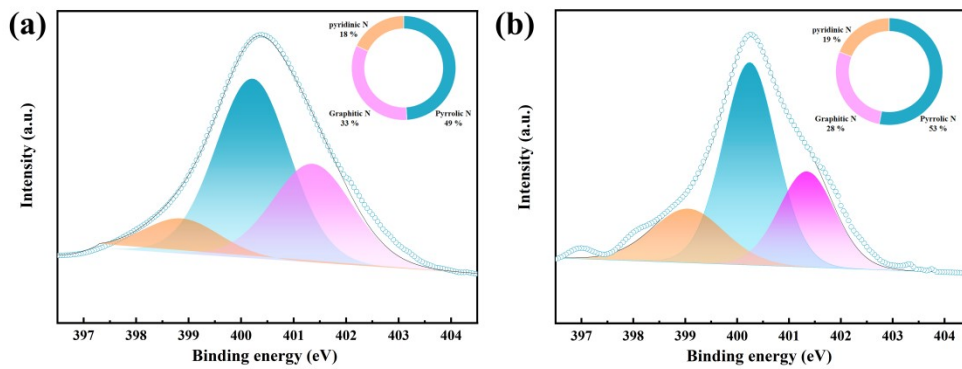

**Fig S5** XPS pattern of relative nitrogen content in the fresh (a) and used (b) Pd-PCz/SAC catalysts

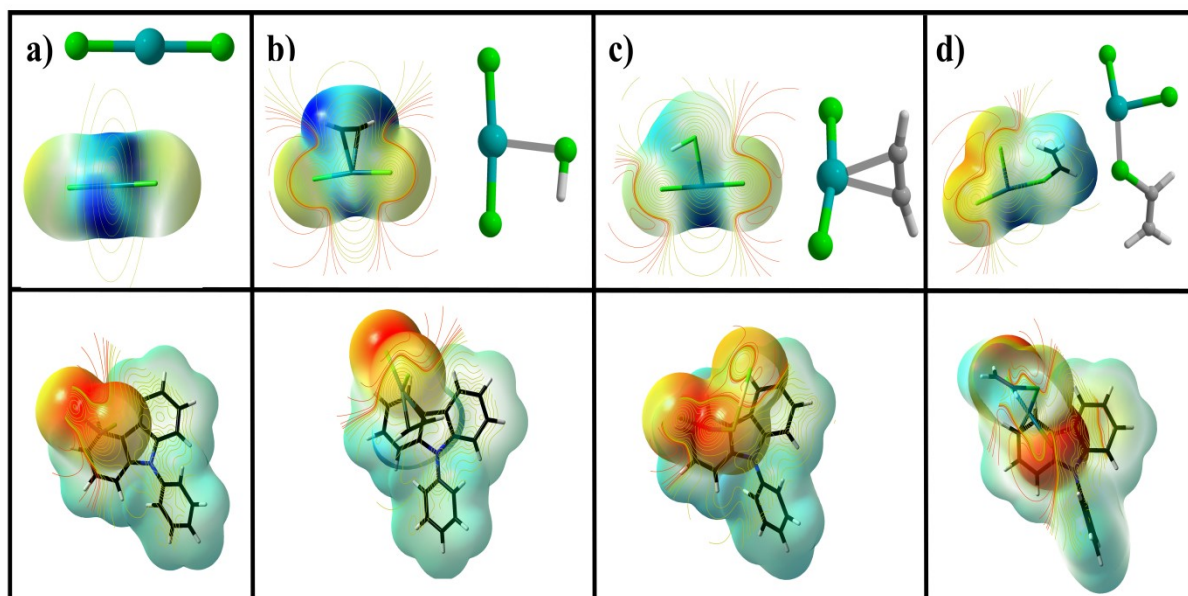

**Fig. S6** ESP mapped molecular surface along with ESP array of PdCl<sub>2</sub> & PCz-PdCl<sub>2</sub> (a), PdCl<sub>2</sub>-PCz-C<sub>2</sub>H<sub>2</sub> (b), PdCl<sub>2</sub>-PCz-HCl (c) and PdCl<sub>2</sub>-PCz-C<sub>2</sub>H<sub>3</sub>Cl (d)



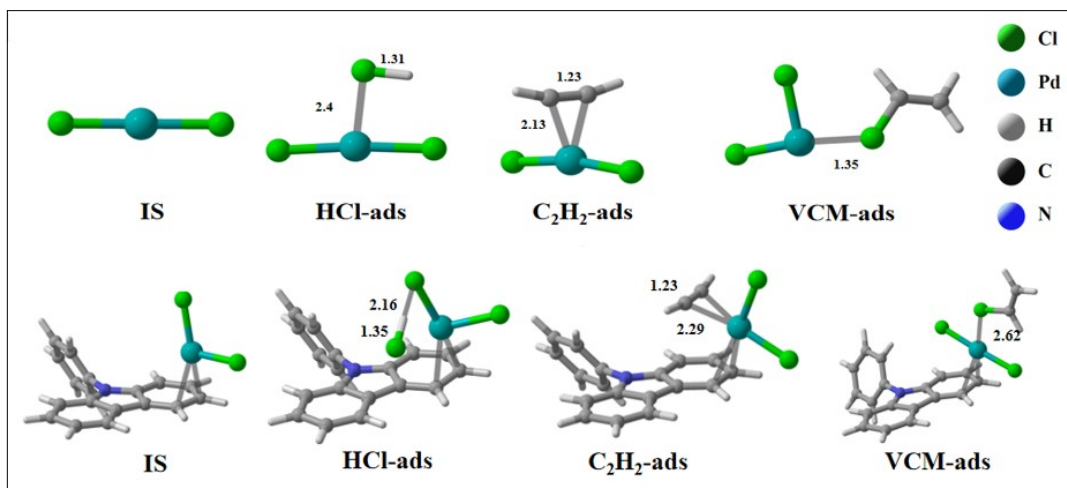

**Fig. S7** The most favorable adsorption configuration of C<sub>2</sub>H<sub>2</sub>, HCl, and VCM with PdCl<sub>2</sub> and PdCl<sub>2</sub>-PCz catalyst (all the bond distances are presented in Å)

**Table S1** Performance of Pd-based catalysts for acetylene hydrochlorination

| Year | Catalyst                                                         | GHSV<br>(h <sup>-1</sup> ) | Temp.<br>(°C) | Acetylene<br>Conversion<br>(%) | Life-time<br>(h) | Ref.      |
|------|------------------------------------------------------------------|----------------------------|---------------|--------------------------------|------------------|-----------|
| 2024 | Pd-PCz/SAC                                                       | 120                        | 160           | 99                             | 380              | This work |
| 2024 | Pd-DBF/SAC                                                       | 120                        | 160           | 99                             | 400              | [1]       |
| 2024 | Pd@20(4-CB)TPPB/USY                                              | 120                        | 160           | 99.9                           | 52               | [2]       |
| 2023 | Pd-20[DBU][Cl]/AC                                                | 360                        | 180           | 96                             | 24               | [3]       |
| 2022 | Pd@15ChCl@USY                                                    | 120                        | 160           | 99                             | 20               | [4]       |
| 2021 | Pd/UHNTs                                                         | 150                        | 160           | 90                             | 94               | [5]       |
| 2020 | 0.1Pd/NC800-TA                                                   | 1000                       | 160           | 94                             | 20               | [6]       |
| 2020 | PANI/CNT-Pd                                                      | 120                        | 160           | 91                             | 20               | [7]       |
| 2019 | (NH <sub>4</sub> ) <sub>2</sub> PdCl <sub>4</sub> /AC            | 100                        | 100           | 99                             | 10               | [8]       |
| 2019 | Pd-A-IL/AC                                                       | 1000                       | 160           | 91                             | 10               | [9]       |
| 2019 | 0.5Pd-10IL/AC                                                    | 740                        | 160           | 98                             | 10               | [10]      |
| 2019 | Pd/7B2-HY                                                        | 110                        | 160           | 95                             | 30               | [11]      |
| 2018 | PdCl <sub>2</sub> /NGCS900                                       | 79.2                       | 100           | 90                             | 20               | [12]      |
| 2018 | Pd NPs@[P <sub>4444</sub> ][C <sub>17</sub> COO]-C <sub>14</sub> | 41                         | 180           | 98                             | 72               | [13]      |
| 2016 | Pd/NH <sub>4</sub> F-urea-HY                                     | 120                        | 160           | 98                             | 8                | [14]      |
| 2016 | Pd/PANI-HY                                                       | 110                        | 160           | 95                             | 300              | [15]      |
| 2016 | Pd-K/NFY                                                         | 110                        | 160           | 99                             | 50               | [16]      |
| 2015 | Pd-K/HY                                                          | 110                        | 160           | 95                             | 2                | [17]      |
| 2013 | Pd/HY                                                            | 110                        | 160           | 95                             | 1                | [18]      |
| 2010 | PdCl <sub>2</sub> /C                                             | 120                        | 160           | 98                             | 3                | [19]      |

**Table S2** Relative content of Pd species in the fresh and used catalysts

| Catalysts        | Pd <sup>2+</sup> | Pd <sup>0</sup> |
|------------------|------------------|-----------------|
| Fresh Pd/SAC     | 63               | 37              |
| Used Pd/SAC      | 58               | 42              |
| Fresh Pd-PCz/SAC | 68               | 32              |
| Used Pd-PCz/SAC  | 65               | 35              |

## References

- [1] S. Ali, L. Wang, H. Yan, C. Yang, J. Wang, H. Sun, X. Li, R. Wu, C. Liang, Enhanced Catalytic Performance of Palladium-Based Catalysts Modified With the Dibenzofuran Ligand for Acetylene Hydrochlorination, *Applied Organometallic Chemistry*, 2 (2024) 7681.
- [2] D. Lei, L. Wang, H. Yan, Z. Long, C. Yang, J. Wang, Q. Guan, H. Sun, X. Li, R. Wu, C. Liang, Metal immobilized in a USY zeolite-supported (4-CB) TPPB: a new strategy of enhanced stability for acetylene hydrochlorination, *Microporous and Mesoporous Materials*, 3 (2024) 113204.
- [3] D. Xingzong, G. Liu, Z. Chen, Q. Zhang, Y. Xu, Z. Liu, Enhanced performance of Pd-[DBU][Cl]/AC mercury-free catalysts in acetylene hydrochlorination, *Chinese Journal of Catalysis*, 46 (2023) 137.
- [4] L. Zeqing, L. Wang, H. Yan, J. Si, M. Zhang, J. Wang, L. Zhao, C. Yang, R. Wu, Design of choline chloride modified USY zeolites for palladium-catalyzed acetylene hydrochlorination, *RSC Advances*, 12 (2022) 9923.
- [5] Z. Meng, L. Wang, H. Yan, L. Lian, J. Si, Z. Long, X. Cui, J. Wang, L. Zhao, C. Yang, R. Wu, Palladium-halloysite nanocomposites as an efficient heterogeneous catalyst for acetylene hydrochlorination, *Journal of Materials Research and Technology*, 13 (2021) 2055.
- [6] W. Bolin, Y. Yue, C. Jin, J. Lu, S. Wang, L. Yu, L. Guo, R. Li, ZT. Hu, Z. Pan, J. Zhao, Hydrochlorination of acetylene on single-atom Pd/N-doped carbon catalysts: Importance of pyridinic-N synergism, *Applied Catalysis B Environmental*, 272 (2020) 118944.
- [7] L. Wang S. Ali, J. Si, L. Lian, H. Yan, J. Wang, L. Ma, Carbon nanotubes supported N-promoted Pd-based catalysts for acetylene hydrochlorination, *E3S Web of Conferences*, 213 (2020) 01004.
- [8] He, H., et al., Design strategies for the development of a Pd-based acetylene hydrochlorination catalyst: improvement of catalyst stability by nitrogen-containing ligands, *RSC Advances*, 9 (2019) 21557.
- [9] C. Yaqing, Y. Yue, S. Wang, J. Lu, B. Wang, C. Jin, L. Guo, Z. Hu, J. Zhao, Adsorption Behavior and Electron Structure Engineering of Pd-Based Catalysts for Acetylene Hydrochlorination, *Catalysts*, 10 (2019) 24.
- [10] Z. Jia, Y. Yue, G. Sheng, B. Wang, H. Lai, S. Di, Y. Zhai, L. Guo, X. Li, Supported ionic liquid-palladium catalyst for the highly effective hydrochlorination of acetylene, *Chemical Engineering Journal*, 360 (2019) 38.
- [11] L. Wang, L. Lian, H. Yan, F. Wang, J. Wang, C. Yang, L. Ma., Acetylene hydrochlorination over boron-doped Pd/HY zeolite catalysts, *RSC Advances*, 9 (2019) 30335.

- [12] L. Pan, M. Ding, L. He, K. Tie, H. Ma, X. Pan, X. Bao, The activity and stability of PdCl<sub>2</sub>/C-N catalyst for acetylene hydrochlorination, *Science China Chemistry*, 61 (2018) 444.
- [13] Y. Lifeng, Q. Yang, J. Hu, Z. Bao, B. Su, Z. Zhang, Q. Ren, H. Xing, Metal nanoparticles in ionic liquid-cosolvent biphasic systems as active catalysts for acetylene hydrochlorination, *AIChE J*, 64 (2018) 2536.
- [14] L. Wang, F. Wang, J. Wang, Non-mercury catalytic acetylene hydrochlorination over a NH<sub>4</sub>F-urea-modified Pd/HY catalyst for vinyl chloride monomer production, *New Journal of Chemistry*, 40 (2016) 3019.
- [15] L. Wang, F. Wang, J. Wang,, Enhanced stability of hydrochlorination of acetylene using polyaniline-modified Pd/HY catalysts, *Catalysis Communications*, 74 (2016) 55.
- [16] L. Wang, F. Wang, J. Wang, Effect of K promoter on the stability of Pd/NFY catalysts for acetylene hydrochlorination, *Catalysis Communications*, 83 (2016) 9.
- [17] F. Wang, L. Wang, J. Wang, Y. Zhao, Y. Wang, D. Yang., Bimetallic Pd-K/Y-zeolite catalyst in acetylene hydrochlorination for PVC production. *Reaction Kinetics, Mechanisms and Catalysis*, 114 (2015) 725.
- [18] L. Wang, F. Wang, J. Wang, X. Tang, Y. Zhao, D. Yang, F. Jia, T. Hao., Hydrochlorination of acetylene to vinyl chloride over Pd supported on zeolite Y, *Reaction Kinetics, Mechanisms and Catalysis*, 110 (2013) 187.
- [19] Q. Song, S. Wang, B. Shen, J. Zhao, Palladium-based catalysts for the hydrochlorination of acetylene: reasons for deactivation and its regeneration, *Petroleum Science and Technology*, 28 (2010) 1825.
