# Supplementary figures and images for: Phenylcarbazole-stabilized palladium catalysts for efficient acetylene hydrochlorination
Source: Royal Society of Chemistry journal article supplement (doi:10.1039/d4cy01414f), 2025-01-01

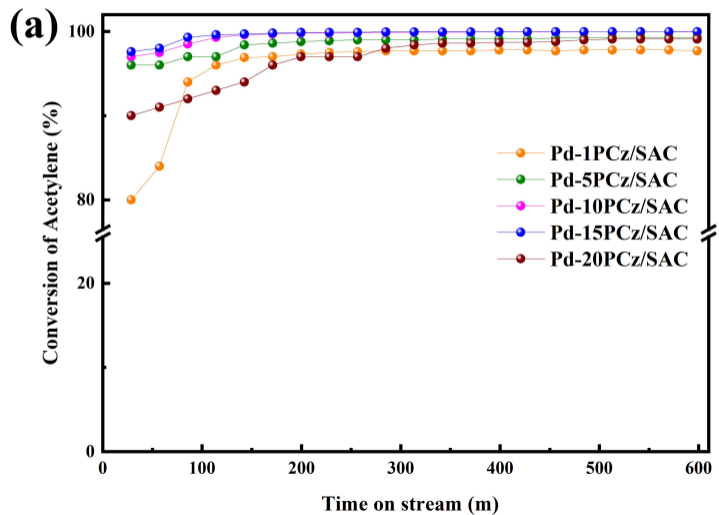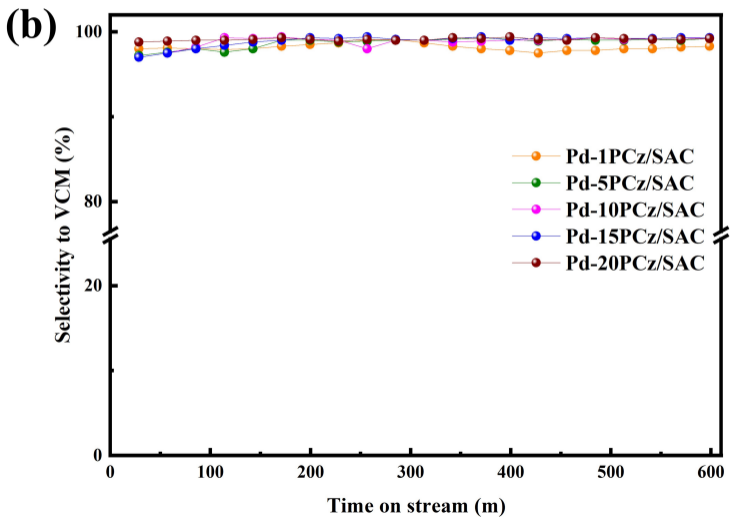

Supplement: d4cy01414f2.pdf [file d4cy01414f2.pdf]

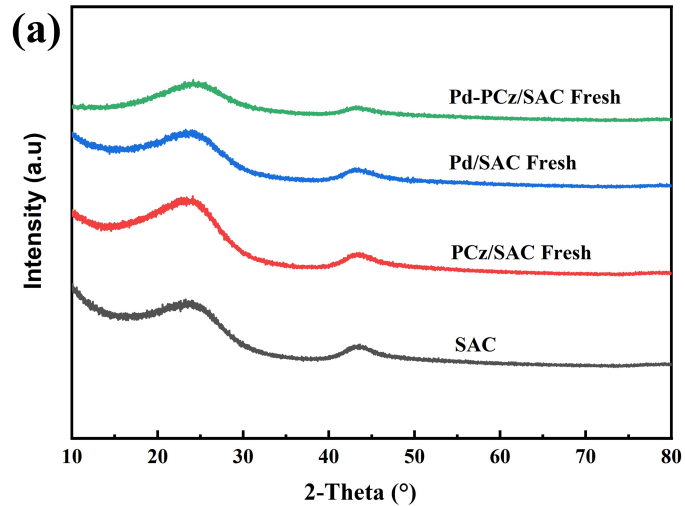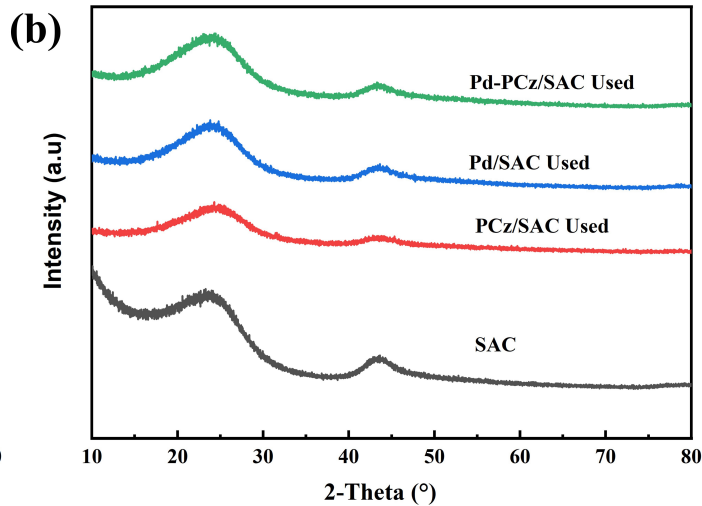

Supplement: d4cy01414f3.pdf [file d4cy01414f3.pdf]

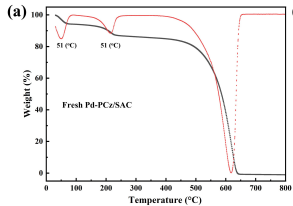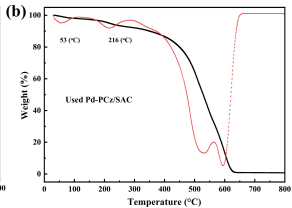

Supplement: d4cy01414f4.pdf [file d4cy01414f4.pdf]

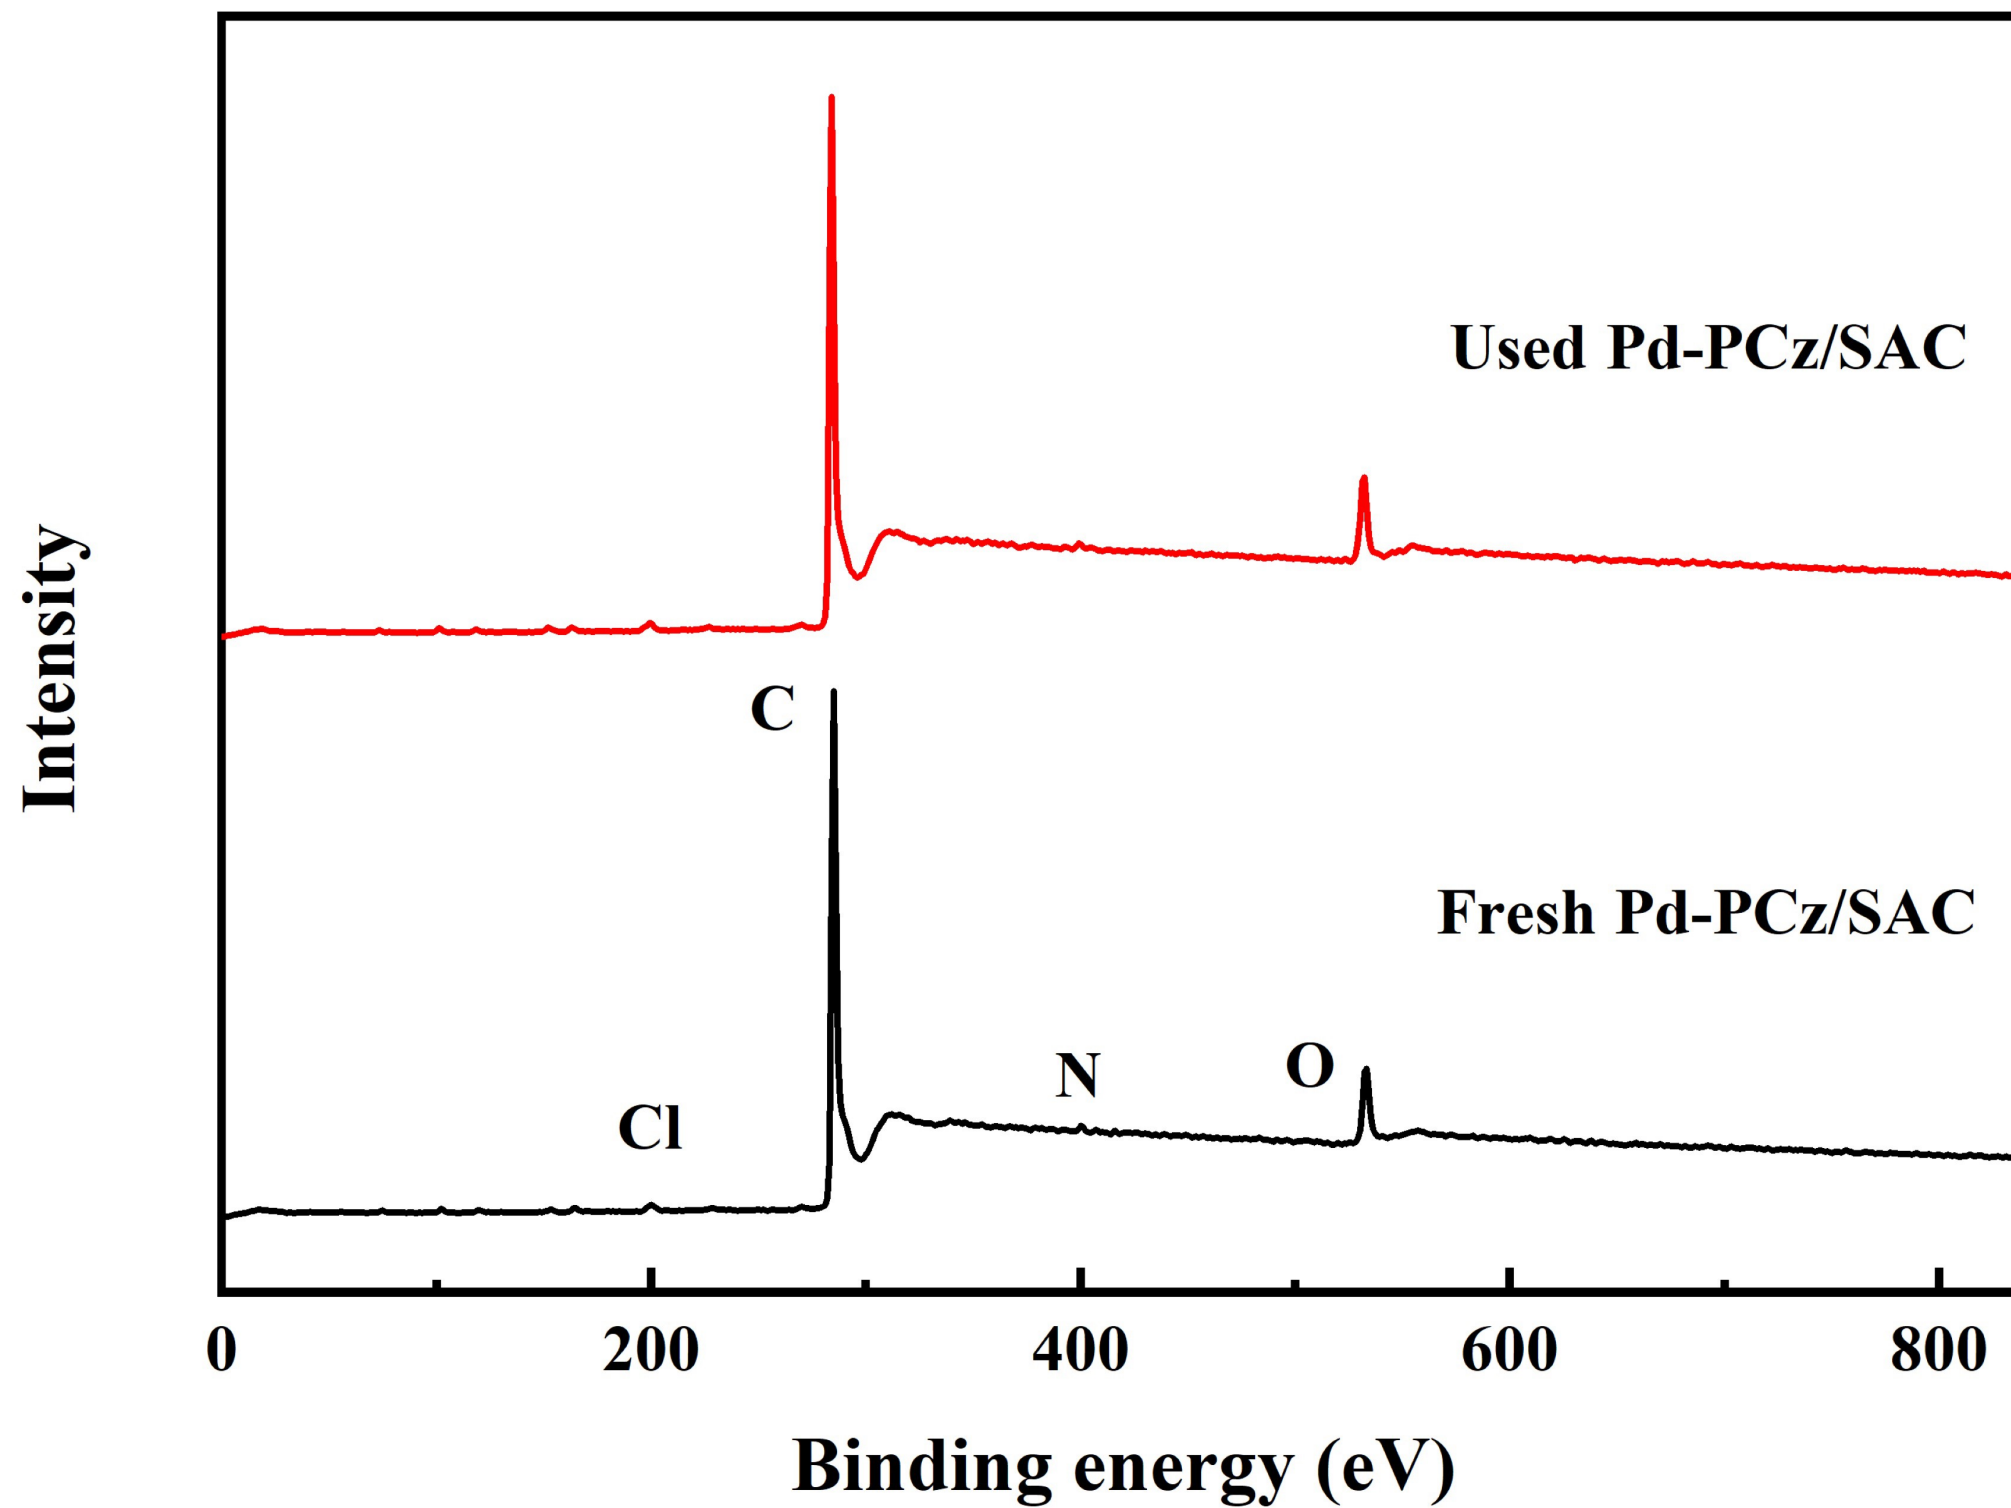

Supplement: d4cy01414f5.pdf [file d4cy01414f5.pdf]

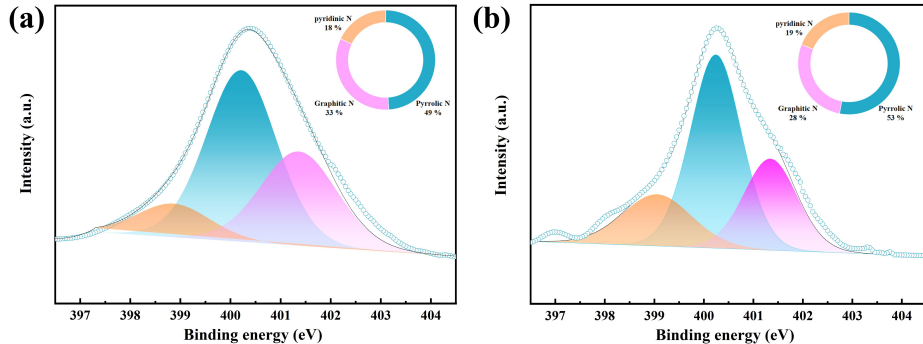

Supplement: d4cy01414f6.pdf [file d4cy01414f6.pdf]

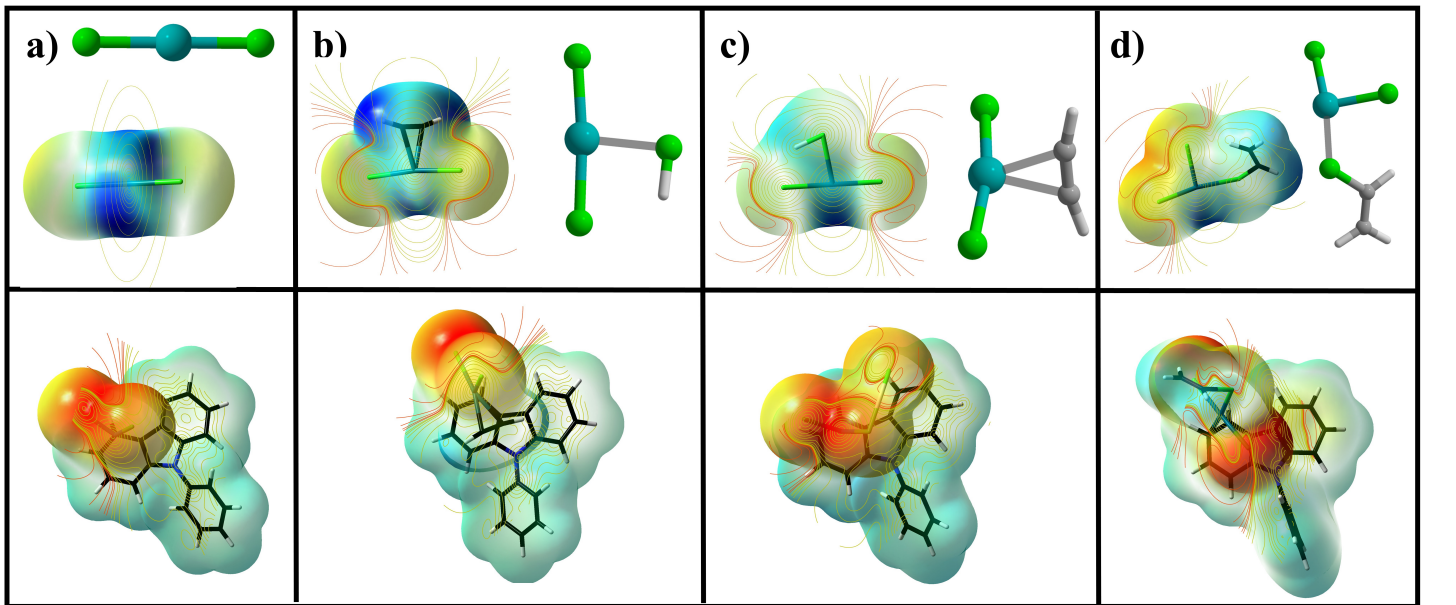

Supplement: d4cy01414f7.pdf [file d4cy01414f7.pdf]

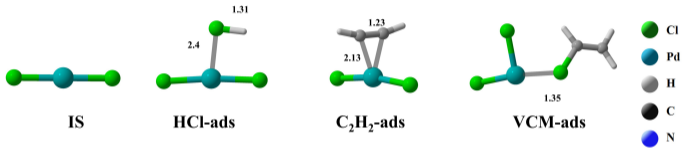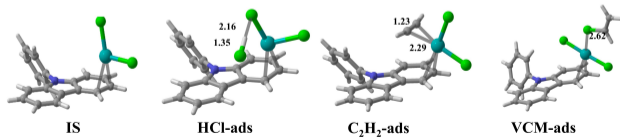

Supplement: d4cy01414f8.pdf [file d4cy01414f8.pdf]
